# Genomic selection to optimize doubled haploid-based hybrid breeding in maize

Jinlong Li<sup>1,2,3,†</sup>, Dehe Cheng<sup>1,†</sup>, Shuwei Guo<sup>1</sup>, Zhikai Yang<sup>2,3</sup>, Ming Chen<sup>1</sup>, Chen Chen<sup>1</sup>, Yanyan Jiao<sup>1</sup>, Wei Li<sup>1</sup>, Chenxu Liu<sup>1</sup>, Yu Zhong<sup>1</sup>, Xiaolong Qi<sup>1</sup>, Jinliang Yang<sup>2,3,\*</sup> and Shaojiang Chen<sup>1,\*</sup>

<sup>1</sup>National Maize Improvement Center of China, Key Laboratory of Crop Heterosis and Utilization (MOE), China Agricultural University, Beijing 100193, China,

<sup>2</sup>Department of Agronomy and Horticulture, University of Nebraska-Lincoln, Lincoln, NE 95613, USA, <sup>3</sup>Center for Plant Science Innovation, University of

Nebraska-Lincoln, Lincoln, NE 95613, USA, <sup>†</sup>These authors contributed equally to this work, <sup>\*</sup>Correspondence: Jinliang Yang (jinliang.yang@unl.edu), Shaojiang Chen (chen368@126.com)

**ABSTRACT** Crop improvement, as a long-term endeavor, requires continuous innovations in technique from multiple perspectives. Doubled haploid (DH) technology for pure inbred production, which shaves years off of the conventional selfing approach, has been widely used for breeding. However, the final success rate of *in vivo* maternal DH production is determined by four factors: haploids induction, haploids identification, chromosome doubling, and successful selfing of the fertile haploid plants to produce DH seeds. Traits in each of these steps, if they can be accurately predicted using genomic selection methods, will help adjust the DH production protocol and simplify the logistics and save costs. Here, a hybrid population (N=158) was generated based on an incomplete half diallel design using 27 elite inbred lines. These hybrids were induced to create F1-derived haploid families. The hybrid materials, as well as the 27 inbreds, the inbred-derived haploids (N=200), and the F1-derived haploids (N=5,000) were planted in the field to collect four DH-production traits, three yield-related traits, and three developmental traits. Quantitative genetics analysis suggested that in both diploids and haploid families, most of the developmental traits showed high heritability, while the DH-production and developmental traits exhibited intermediate levels of heritability. By employing different genomic selection models, our results showed that the prediction accuracy ranged from 0.52 to 0.59 for the DH-production traits, 0.50 to 0.68 for the yield-related traits, and 0.44 to 0.87 for the developmental traits. Further analysis using index selection achieved the highest prediction accuracy when considering both DH production efficiency and the agronomic trait performance. Furthermore, the long-term responses through simulation confirmed that index selection would increase the genetic gain for targeted agronomic traits while maintaining the DH production efficiency. Therefore, our study provides an optimization strategy to integrate GS technology for DH-based hybrid breeding.

**KEYWORDS** Maize; Doubled Haploid; Genomic selection; Hybrid breeding; Index selection

## ABBREVIATIONS

- AER – anther emergence ratio
- BLUPs – best linear unbiased predictors
- CTAB – cetyltrimethylammonium bromide
- DFP – double-fluorescence protein
- DH – doubled haploid
- DTS – days to silking
- EH – ear height
- FFR – female fertility ratio
- GBLUP – genomic best linear unbiased prediction
- GBLUP-A – genomic best linear unbiased prediction with only additive effect
- GBLUP-AD – genomic best linear unbiased prediction with both additive effect and dominant effect
- GEV – genomic estimated breeding value
- GS – genomic selection
- HFF – haploid female fertility
- HIR – haploid induction rate
- HMF – haploid male fertility

- 36 • HPR – haploid plant rate
- 37 • KRN – kernel row number
- 38 • KNPR – kernel number per row
- 39 • MAF – minor allele frequency
- 40 • PCA – principal component analysis
- 41 • PH – plant height
- 42 • rrBLUP – ridge regression best linear unbiased prediction
- 43 • SNP – single nucleotide polymorphism
- 44 • TKC – total kernel count

## 45 Introduction

46 Doubled haploid (DH) technology for homozygous inbred line production has been widely used in modern  
47 maize breeding because of the high efficiency and the low cost. Nevertheless, the molecular mechanisms by  
48 which the haploid is being induced remain mostly unclear. The maternal haploid induction rate is considered  
49 as a quantitative trait controlled by multiple genetic loci (Wu *et al.* 2014). Recently, major breakthroughs have  
50 been made by cloning the large effect QTLs for haploid induction, i.e., *qhir1* (Kelliher *et al.* 2017; Gilles *et al.* 2017;  
51 Liu *et al.* 2017) and *qhir8* (Zhong *et al.* 2019). These cloned genes and associated molecular evidence allowed  
52 researchers to re-evaluate the two competing hypotheses explaining the maternal haploid induction: (1) regular  
53 double fertilization followed by male chromosome elimination and (2) impaired double fertilization or single  
54 fertilization (Li *et al.* 2009a; Tian *et al.* 2018). It eventually led to a unified hypothesis that both fertilization  
55 defects and chromosome elimination could be involved in the maternal haploid induction (Chaikam *et al.*  
56 2019b; Jacquier *et al.* 2020). However, more evidence is needed to elucidate the detailed molecular mechanisms  
57 for the phenomena.

58 To obtain the maternal DH lines *in vivo*, four essential steps are involved: (1) induction of maternal haploids  
59 by a male haploid inducer, (2) identification of haploid kernels or seedlings, (3) chromosome doubling of  
60 haploid seedlings (D0), and (4) selfing of fertile D0 plants to obtain DH seeds (Molenaar *et al.* 2019; Chaikam  
61 *et al.* 2019b). In the past several decades, continuous efforts have been made to improve the DH production  
62 from every perspective. To increase the haploid induction rate (HIR), several highly effective inducers have  
63 been developed, including MHI (Chalyk 1999), CAUHOI (Ming 2003), RWS (Röber *et al.* 2005), and PHI  
64 (Rotarenco *et al.* 2010), resulting in a dramatic increment of the HIR from 1-3% to 6-15% (Chaikam *et al.* 2019a).  
65 Besides the male factor, maternal germplasm also been confirmed to influence HIR (Kebede *et al.* 2011; Wu *et al.*  
66 2014). After the induction, however, it is crucial to distinguish the induced haploids from the non-induced  
67 diploid kernels in order to make the following field trials more cost-effective. Currently, the widely used  
68 method for haploid identification is the *R1-nj* color marker system, where the haploid seeds show purple  
69 color on the aleurone only and the diploids exhibit purple color on both the aleurone and scutellum (Chaikam  
70 *et al.* 2015). To identify the haploid kernels more accurately and worthwhile, multiple different approaches or  
71 markers have been developed, including oil content (Ming 2003), Near-Infrared Spectroscopy (NIR) (Jones  
72 *et al.* 2012; Lin *et al.* 2019), and the double-fluorescence protein (DFP) marker (Dong *et al.* 2018). Chromosome  
73 doubling, or the haploid male fertility (HMF) and haploid female fertility (HFF), can be enhanced by chemical  
74 reagents, such as colchicine and herbicide (Saisingtong *et al.* 1996), but these chemicals are both harmful for  
75 human health and detrimental for the environment. Thus, spontaneous haploid genome doubling has been  
76 put on center stage (Ren *et al.* 2017; Boerman *et al.* 2020). Recent QTL studies suggested that the HMF is likely  
77 affected by several small effect loci (Ma *et al.* 2018; Ren *et al.* 2020). Relative to the low success rate of HMF,  
78 HFF exhibited a much higher success rate by pollinating from normal diploid plants (Geiger *et al.* 2006). And,  
79 therefore, HFF was not considered as a limiting factor for maternal DH production.

80 The ultimate goal of producing DH lines is to generate desired recombinants and to increase the genetic  
81 gain for traits of interest. However, because the genetic variation affects the success rates of maternal DH  
82 production for each step (Prigge and Melchinger 2012), it is necessary to select the appropriate DH-production  
83 methods based on the genotype without sacrificing the potential genetic gain. Genomic selection (GS), as a  
84 recently emerged technology to predict the performance of the plants without phenotyping, has been proved

85 to be effective in plant breeding (Lin *et al.* 2016; Slater *et al.* 2016) and has the potential to increase the efficiency  
86 of DH-based selection. The widely used GBLUP model treats individual genotypes as random effects with  
87 their genomic relationship calculated from genome-wide markers (Henderson *et al.* 1984). Similarly, in the  
88 ridge regression BLUP (rrBLUP) model, markers were treated as random effects, with an assumption that each  
89 marker accounts for an equal amount of the genetic variance (Whittaker *et al.* 2000). The Bayesian alphabet  
90 models, i.e., Bayes A and Bayes B (Hayes *et al.* 2001), and Bayes C $\pi$  (Habier *et al.* 2011), for genomic selection  
91 use hyperparameters to model marker variances differently (Kärkkäinen and Sillanpää 2012; Alves *et al.* 2019).  
92 Recently, some additional models, such as Neural Networks (Gianola *et al.* 2011), Bayesian LASSO (Gianola  
93 2013), RKSH (Gianola *et al.* 2006), were developed and claimed to outperform the conventional models in some  
94 cases (Ogutu *et al.* 2012). In addition to enhance the statistical models, considering complex genetic effects can  
95 also have the potential to increase the prediction accuracy for GS. By considering dominance (Technow *et al.*  
96 2012) and epistasis effects (Cossa *et al.* 2014), or even the genotype by environmental interactions (e Sousa *et al.*  
97 2017), researchers improved the prediction performance for yield related and developmental traits in maize.  
98 Recently, Omics data started to be integrated into the genomic selection models. For example, transcriptomic  
99 and metabolomic data have been combined into genomic selection to boost the power of prediction (Hu  
100 *et al.* 2019). Additionally, by incorporating evolutionary information into the genomic selection model, the  
101 prediction accuracy has been improved for up to 4% for yield-related traits in maize (Yang *et al.* 2017).

102 In this study, we sought to develop a strategy to integrate the GS for genetic improvement by considering  
103 the efficiency of DH production. With the empirical dataset collected from every step during DH production  
104 processes, results showed that DH-production traits could be accurately predicted using the GS models. To  
105 optimize the DH-based GS procedure, we constructed index traits and conducted index selection over 30  
106 generations through simulation. The substantial long-term genetic gain using the index selection approach  
107 showed the feasibility of increasing multiple traits simultaneously. Our study streamlined a DH-based GS  
108 protocol that, if applied, has the great potential to facilitate plant breeding to meet the increasing food demands  
109 in the coming decades.

## 110 **Materials and Methods**

### 111 ***Plant materials and field experimental design***

112 Here, 27 elite inbred lines were selected and crossed at Sanya (N18°37' E109°17') in 2017 Winter nursery  
113 according to an incomplete half diallel design to obtain N=158 hybrids (**Figure S1, Table S1**). In the following  
114 seasons, these hybrids and the inbred parents were grown in Beijing (N40°9' E116°23') during Summer 2018  
115 and Sanya during Winter 2018. In the field, each accession was planted in a one-row plot with two replications;  
116 and 11 seeds were planted within each plot at a spacing of 60 cm between rows and 25 cm between plants.  
117 The CAU6, a haploid inducer with a high HIR (Zhong *et al.* 2019), was used to induce all hybrids and inbred  
118 parental lines at each location. After harvesting, the F1-derived and the inbred-derived haploid kernels were  
119 identified manually using the *R1-nj* color system (Chaikam *et al.* 2015). The identified haploid kernels were  
120 planted during Summer 2018 in Beijing and Winter 2018 in Sanya. For each F1-derived or inbred-derived  
121 haploid family, 48 individuals were planted in a three-row plot at a spacing of 60 cm between rows and 17 cm  
122 between plants. All of these haploids were pollinated by an inbred line C7-2, which has a high pollen count to  
123 ensure the success rate of pollination. The mature ears from the fertile plants were harvested manually.

### 124 ***Phenotypic data collection***

125 Along the four divided DH production processes, phenotypic data for ten different traits were collected. Briefly,  
126 data for three developmental traits, i.e., the plant height (PH), the ear height (EH), and the days to silking  
127 (DTS), were collected from the inbred parental lines and hybrids. To ensure the accuracy, three plants were  
128 measured for each row, and the average values were calculated for the following analyses. After crossing the  
129 hybrids and inbred lines with the inducer CAU6, mature ears were harvested to manually count the number of  
130 haploid kernels ( $n_{hk}$ ), diploid kernels ( $n_{dk}$ ), and embryo abortion kernels ( $n_{eak}$ ). With these counts, the maternal  
131 haploid induction rate (HIR) was calculated as  $\frac{n_{hk}}{n_{hk}+n_{dk}+n_{eak}}$ . At each location, about 10 plants were induced  
132 for each hybrid. In the following seasons, putative haploid kernels were sowed, and diploid plants were

133 identified using plant morphology observation method at around the V6-V8 stage (Ciampitti *et al.* 2011). With  
134 the field observation, the haploid plant rate (HPR) was calculated as  $\frac{n_{hp}}{n_{hp}+n_{dp}}$ , where  $n_{hp}$  was the number of  
135 haploid plants and  $n_{dp}$  was the number of diploid plants. The identified diploid plants were removed after data  
136 collection and the remaining haploid plants were pollinated by the elite inbred line C7-2. From the haploid  
137 plants, female and male fertility traits were collected. Briefly, the female fertility ratio (FFR) was calculated as  
138  $\frac{n_k}{n_k+n_{nk}}$ , where  $n_k$  was the number of haploids contained more than one kernel,  $n_{nk}$  was the number of sterile  
139 haploids that didn't generate any kernels. To evaluate haploid male fertility (HMF) trait, anther emergence  
140 ratio (AER) was computed using the formula of  $\frac{n_{am}}{n_{am}+n_{nam}}$ , where  $n_{am}$  was the number of haploids that had  
141 observable anthers,  $n_{nam}$  was the number of haploids failed to detect any anthers. Finally, developmental traits  
142 were collected from the haploid plants, including PH, EH, and DTS; and yield-related traits were collected  
143 from the harvested mature ears, including the kernel row number (KRN) and the kernel number per row  
144 (KNPR). Because most of the ears didn't have a full set of kernels, KRN and KNPR were evaluated using the  
145 embryo sac. Total kernel count (TKC) for each ear was simply computed by using  $KRN \times KNPR$ .

### 146 **Phenotypic data analysis**

147 The raw phenotypic data were analyzed using the linear mixed model with an R add-on package lme4 (Bates  
148 *et al.* 2015). Best linear unbiased predictors (BLUPs) were calculated for each F1-derived haploid family. In the  
149 model,

$$Y_{ij} = \mu + g_i + l_j + g_i \times l_j + \varepsilon \quad (1)$$

150 where,  $Y_{ij}$  is the mean phenotypic value of the  $i$ th F1-derived haploid family evaluated in the  $j$ th location;  
151  $\mu$  is the overall mean of the phenotypic trait in a F1-derived haploid family;  $g_i$  is the random effect of the  
152  $i$ th F1-derived haploid family;  $l_j$  is the random effect of the  $j$  location;  $g_i \times l_j$  is the random interaction effect  
153 between the  $i$ th F1-derived haploid family and the  $j$ th location; and  $\varepsilon$  is the random error.

154 Similarly, BLUP values were calculated for each diploid genotype, where genotype, location, genotype  
155 and location interaction, and replication were treated as random effects. For traits collected in only one  
156 location, such as PH in inbred-derived haploid population, a simpler linear mixed model was employed,  
157 where genotype and plot were treated as random effects.

158 Heritability was calculated using variance component estimates from the above models. The following  
159 equation was used to estimate heritability on an individual plot basis,

$$H^2 = \frac{V_g}{V_g + \frac{V_{g \times k}}{k} + \frac{V_\varepsilon}{k \times r}} \quad (2)$$

160 where  $V_g$  is the genotypic variance component,  $V_\varepsilon$  is the experimental error variance,  $k$  is the number of  
161 locations,  $r$  is the number of replications ( $r = 1$  for the haploid family and  $r = 2$  for the inbreds and F1  
162 hybrids).

### 163 **Genotypic data processing and population structure analysis**

164 Leaf tissues were sampled from the 27 inbred parental lines for DNA extraction using the CTAB method  
165 (Porebski *et al.* 1997). Then, genotyping was conducted using the Maize-60K SNP chip. SNPs with minor allele  
166 frequency (MAF)  $< 0.05$  and per locus missing rate  $> 0.2$  were filtered out using plink 1.90 (Chang *et al.* 2015).  
167 The cleaned SNP genotypes ( $N = 30,887$ ) were projected onto the F1 hybrids using a customized python  
168 package "impute4diallel" (<https://github.com/jyanglab/impute4diallel>).

169 By using the imputed SNPs, population structure analysis was conducted using the STRUCTURE software  
170 (Pritchard *et al.* 2000). In addition, Principal Components Analysis (PCA) was performed using the "princomp"  
171 function in R.

172 **Pedigree and genomic data enabled prediction models**

173 The BLUP-based models were used to combine genomic or pedigree information into consideration (VanRaden  
174 2008). In practice, the model is:

$$\mathbf{y} = \mathbf{X}\mathbf{b} + \mathbf{Z}\mathbf{u} + \mathbf{e} \quad (3)$$

175 where  $\mathbf{y}$  is a vector of the phenotype;  $\mathbf{X}$  is a design matrix relating the fixed effects to each individual;  $\mathbf{b}$  is a  
176 vector of fixed effects;  $\mathbf{Z}$  is a design matrix allocating records to genetic values;  $\mathbf{u}$  is a vector of genetic effects  
177 for each individual; and  $\mathbf{e}$  is a vector of random normal deviates with variance  $\delta^2$ .

178 In our study, three different models based on above equation were applied, including genomic best linear  
179 unbiased prediction (GBLUP) with only additive effect (GBLUP-A), GBLUP with both additive effect and  
180 dominant effect (GBLUP-AD), and ridge regression best linear unbiased prediction (rrBLUP) (Endelman 2011).  
181 The models are,

$$\mathbf{y} = \mathbf{1}_n\mu + \mathbf{G}_a\mathbf{g}_a + \mathbf{e} \quad (4)$$

$$\mathbf{y} = \mathbf{1}_n\mu + \mathbf{G}_a\mathbf{g}_a + \mathbf{G}_d\mathbf{g}_d + \mathbf{e} \quad (5)$$

$$\mathbf{y} = \mathbf{1}_n\mu + \mathbf{W}\mathbf{G}\mathbf{u} + \mathbf{e} \quad (6)$$

182 where  $\mathbf{y}$  is the observed phenotypic value;  $\mathbf{1}_n$  is a vector of ones (ignoring fixed effects);  $\mu$  is the grand mean;  
183  $\mathbf{G}_a$  and  $\mathbf{G}_d$  are the relationships matrices calculated by different methods;  $\mathbf{W}$  is the design matrix associating  
184 accessions to observations; and  $\mathbf{G}$  is the genotype matrix (row represents accessions and column represents  
185 biallelic SNP values);  $\mathbf{g}_a$  and  $\mathbf{g}_d$  are vectors of additive and dominance genetic effects, respectively;  $\mathbf{u}$  denotes  
186 marker effects; and  $\mathbf{e}$  is the residual error.

187 **The relationship matrix construction**

188 The markers were coded as 1, 0, and  $-1$ , for SNP genotypes  $A_1A_1$ ,  $A_1A_2$ , and  $A_2A_2$ , respectively. The kinships  
189 of hybrids calculated from two genomic-based ( $\mathbf{G}_a$  for additive,  $\mathbf{G}_d$  for dominance) relationship matrices. The  
190  $\mathbf{G}_a$  and  $\mathbf{G}_d$  were calculated as follows,

$$\mathbf{G}_a = \frac{\mathbf{M}_a\mathbf{M}_a'}{2\sum_j p_j(1-p_j)} \quad (7)$$

$$\mathbf{G}_d = \frac{\mathbf{M}_d\mathbf{M}_d'}{4\sum_j p_j^2(1-p_j)^2} \quad (8)$$

191 where  $p_j$  is the frequency of  $A_1$  allele at marker  $j$ ;  $\mathbf{M}_a$  and  $\mathbf{M}_d$  are the  $n \times m$  matrices ( $n$  is the number of  
192 individuals and  $m$  is the number of markers);  $\mathbf{M}_a'$  and  $\mathbf{M}_d'$  are the transposed matrices of  $\mathbf{M}_a$  and  $\mathbf{M}_d$ . And the  
193 element of  $\mathbf{M}_a$  or  $\mathbf{M}_d$  for the  $i$ th individual at the  $j$ th marker is calculated as follows:

$$\mathbf{M}_{a_{ij}} = \begin{cases} -2p_j(A_1A_1) \\ 1 - 2p_j(A_1A_2) \\ 2 - 2p_j(A_2A_2) \end{cases}$$

$$\mathbf{M}_{d_{ij}} = \begin{cases} -2p_j^2(A_1A_1) \\ 2p_j(1-p_j)(A_1A_2) \\ -2(1-p_j)^2(A_2A_2) \end{cases}$$



## 194 **Construction of the index traits**

195 The indices were constructed using normalized values of the four DH-production traits and three yield-related  
196 traits using this formula for reasons that will be explained below.

$$Index = w \sum_{i=1}^4 D_i + (1 - w) \sum_{j=1}^3 Y_j \quad (9)$$

197 where  $w$  is the weighting parameter ranged from 0 to 1; in these experiments steps of 0.1 each were chosen. In  
198 the equation,  $D_i$  is the  $i_{th}$  DH-production trait (i.e., HIR, HPR, AER, and FFR); and  $Y_j$  is the  $j_{th}$  yield-related  
199 trait (i.e., TKC, KNPR, and KRN). Normalized trait values (with mean =0 and sd=1) were used to build the  
200 indices. The rrBLUP model was selected as the predictive model for the index traits. The 5-fold cross-validation  
201 method with 100 replications was used to assess the predictive ability for each index.

## 202 **Simulation for the DH-based long-term selection**

203 To test the long-term responses of index selection, simulated selection experiments were conducted for 30  
204 cycles. Our real-world hybrid population (N=158) was used as the initial training population. In the simulation,  
205 for each cycle, the top 20 hybrids based on the genomic estimated breeding values (GEBVs) were selected to  
206 be induced as haploids. The recombinations were simulated using an R add-on package "hypred" (Technow  
207 2011) based on the published genetic map (Yu *et al.* 2008). The best recombinant haploid that survived for each  
208 hybrid-derived haploid family was doubled. These DH lines were crossed in a half-diallel manner to form the  
209 next cycle of hybrids. The GEBVs of simulated hybrids (N=190) were predicted using the rrBLUP model. Each  
210 simulation was repeated 20 times.

## 211 **Results**

### 212 **The DH-production traits exhibited substantial genetic variation**

213 In the first field experiment, 27 selected elite inbreds were crossed to generate F1 hybrids (N=158) based on  
214 a diallel design (**Figure 1** shows the experimental design and **Figure S1** specifies the hybrids made). These  
215 inbreds and hybrids were subsequently induced by CAU6 inducer (Zhong *et al.* 2019). The induced seeds  
216 were planted at two locations over three years. At each location, haploids were manually identified before  
217 flowering time and then pollinated by the C7-2 — an elite inbred line with a high pollen count (Li *et al.* 2009b).  
218 A number of phenotypic data were collected along with these processes, including four DH-production traits,  
219 three yield-related traits, and three plant developmental traits (**Table 1**, see **Materials and methods**). For these  
220 collected traits, the best linear unbiased predictors (BLUPs) were calculated for each genotype and haploid  
221 family (**Table S1**).

222 The BLUP values of the DH-production traits, including haploid induction rate (HIR), haploid plant rate  
223 (HPR), anther emergence ratio (AER), and female fertility ratio (FFR), exhibited bell-shaped distributions  
224 (**Figure 2**). The estimated mean HIR was  $0.15 \pm 0.01$ , the lowest of the four DH-production traits, consistent  
225 with the previous observation that haploid induction was the step limiting trait for DH production (Prigge *et al.*  
226 2012). In this experiment, the HPR, or the rate of the haploid plants out of the total plants, showed the highest  
227 value (mean =  $0.91 \pm 0.05$ , ranged from 0.63 to 0.97), but substantial variations were observed. Two fertility  
228 traits, the male fertility trait (i.e., AER) and the female fertility trait (i.e., FFR), exhibited large variations with  
229 intermediate mean values of  $0.34 \pm 0.07$  and  $0.56 \pm 0.06$ , respectively.

230 The developmental (i.e., PH, EH, and DTS) and yield-related traits (i.e., KRN, KNPR, and TKC) collected  
231 from the inbred parents, hybrids, inbred-derived haploids, and F1-derived haploids also exhibited distinct  
232 distributions (**Figure S2** and **Figure S3**), with diploids performing significantly better than haploids (Students'  
233 t-test, P-value < 0.05), except for DTS, whereas the haploids were flowering late than hybrids but earlier than  
234 inbreds. Interestingly, inbred-derived haploids performed significantly better than hybrid-derived haploids  
235 for these developmental and yield-related traits, except for DTS (Student's t-test, P-value < 0.01).

236 Additionally, correlation analysis suggested that the traits in diploids were correlated with traits in haploids  
237 derived from these diploids, especially for the developmental traits, whereas the Pearson correlation coefficients

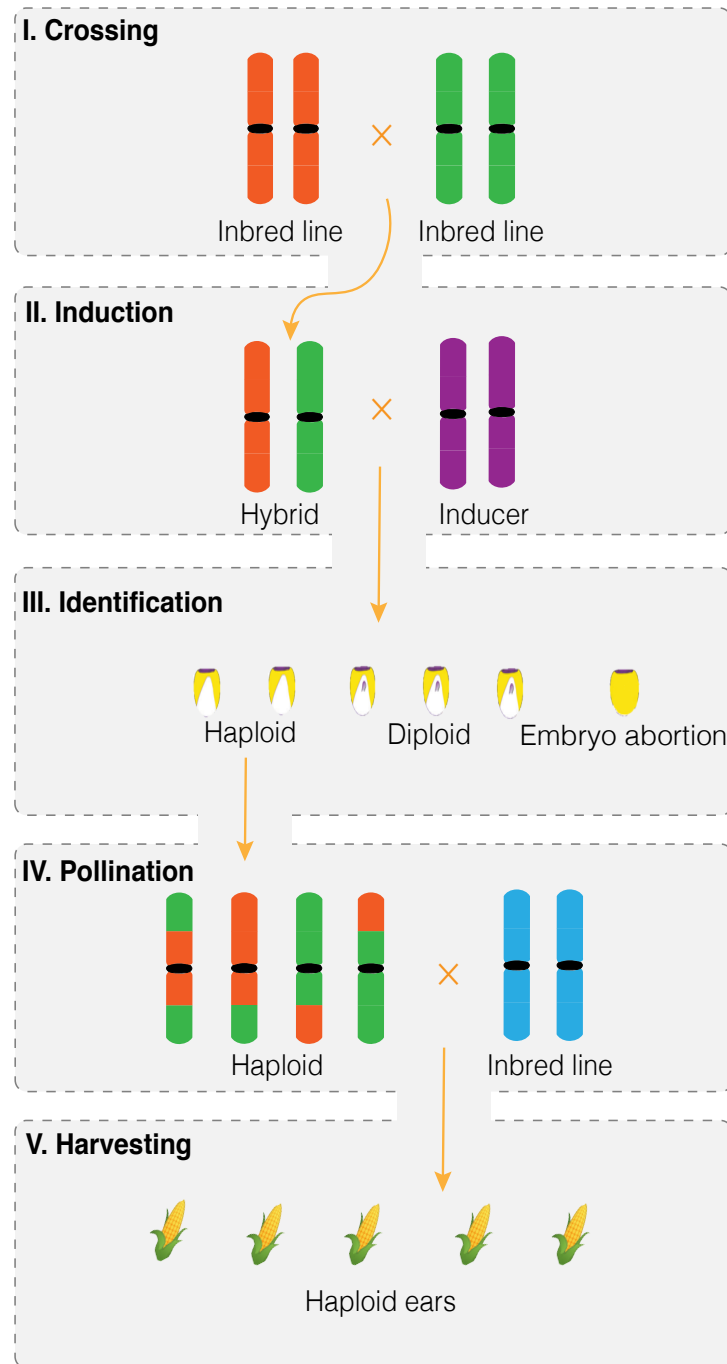

**Figure 1 Schematic diagram of the experimental design.** The diagram illustrates the five steps involved in the DH production, including crossing elite inbred lines to generate F1 hybrids (I), haploid induction using CAU6 as an inducer (II), haploid identification from harvested kernels (III), haploid pollination with an elite inbred line C7-2 (IV), and the harvesting of the mature ears from the haploid plants (V).

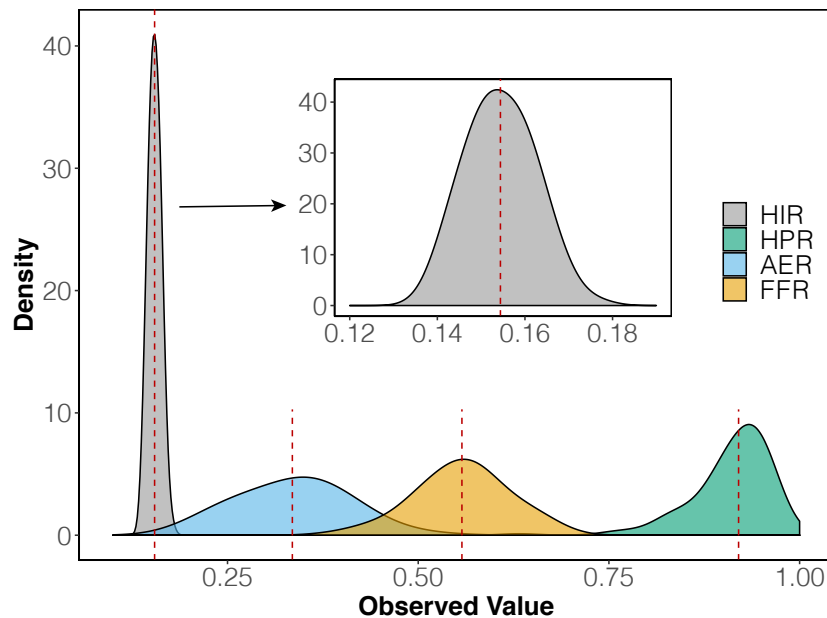

**Figure 2 Phenotypic distributions of the four DH production-related traits.** The probability density for values of the phenotypic trait of the F1-derived haploid families for the haploid induction rate (HIR), the haploid plant rate (HPR), the male fertility ratio (AER), and female fertility ratio (FFR) traits. The dotted red lines denote the mean values.

238 were above 0.6 for both PH and EH traits (**Figure S4**). For the yield-related traits (i.e., KRN, KNRP, and TKC),  
239 the correlations of BLUP values between haploids and diploids were weaker ( $r = 0.23 - 0.51$ ) but still  
240 statistically significant (Pearson correlation test, P-value < 0.05). Pair-wise correlations among the three  
241 categories of the traits showed that developmental and yield-related traits were positively correlated. However,  
242 in general, DH-production traits were negatively correlated with developmental traits and the yield-related  
243 traits, with some exceptions, for example, AER and DTS in hybrids ( $r = 0.30$ ), AER and KNRP in hybrids  
244 ( $r = 0.24$ ), AER and TKC in hybrids ( $r = 0.20$ ), and FFR and KRN in haploids ( $r = 0.17$ ) (**Figure S5**).

#### 245 **The DH-production traits showed moderate levels of heritability**

246 Phenotypes observed at multiple locations allowed us to estimate the heritability (see **Materials and methods**).  
247 The heritabilities of the four DH-production traits were 0.41, 0.39, 0.44, and 0.41 for HIR, HPR, AER, and FFR,  
248 respectively, largely consistent with previous studies (Wu *et al.* 2014, 2017; Ma *et al.* 2018) (**Table 1**). For the  
249 developmental and yield-related traits, heritabilities were estimated for both F1 hybrids and hybrid-derived  
250 haploid families. The yield-related traits, such as TKC and KNPR, exhibited intermediate levels of heritabilities  
251 (i.e., around 0.4 regardless of the populations), while the heritability for KRN was relatively higher (0.59  
252 calculated from the hybrids and 0.70 from the F1-derived haploid families). For developmental traits, PH and  
253 EH exhibited high heritabilities in both haploid and diploid populations, ranging from 0.75 to 0.87. It was  
254 noticeable that heritability was extremely low for the DTS trait in the hybrid-derived haploid families, likely  
255 because male fertility after haploid induction was confounded with the flowering time trait. After excluding  
256 DTS, the heritability differences between F1 hybrids and hybrid-derived haploid families were insignificant  
257 (Paired t-test, P-value = 0.37).

#### 258 **Genomic selection models for traits prediction**

259 The parental inbred lines were genotyped using an SNP array (see **Materials and methods**). After SNP quality  
260 control, 30,887 remaining SNPs were projected onto the F1 hybrids. By using these projected SNPs, population  
261 structure analysis was conducted with STRUCTURE software (Pritchard *et al.* 2000). After testing group  
262 values ( $k$ ) ranged from 2 to 10,  $k = 3$  showed the highest likelihood, suggesting three subgroups within the F1



**Table 1** Summary of the phenotypic data analysis.

| Category                | Trait (abbreviation)         | Type                      | Stage <sup>†</sup> | Location <sup>‡</sup> | N <sup>§</sup> | BLUPs (Mean±SD) | H <sup>2*</sup> |
|-------------------------|------------------------------|---------------------------|--------------------|-----------------------|----------------|-----------------|-----------------|
| DH-production traits    | Haploid Induction Rate (HIR) | F1-derived kernels        | III                | b, c                  | 124            | 0.15±0.01       | 0.41            |
|                         | Haploid Plant Rate (HPR)     | F1-derived haploid family | IV                 | c, d                  | 133            | 0.91±0.05       | 0.39            |
|                         | Anther Emerge Ratio (AER)    | F1-derived haploid family | IV                 | c, d                  | 132            | 0.34±0.07       | 0.44            |
|                         | Female Fertility Ratio (FFR) | F1-derived haploid family | V                  | c, d                  | 132            | 0.56±0.06       | 0.41            |
| Developmental traits    | Plant Height (PH)            | Inbred                    | I                  | a, b, c               | 27             | 175.90±21.55    | 0.87            |
|                         |                              | Inbred-derived haploid    | IV                 | d                     | 23             | 133.93±15.96    | -               |
|                         |                              | F1 Hybrid                 | II                 | b, c, d               | 154            | 234.14±16.66    | 0.77            |
|                         |                              | F1-derived haploid family | IV                 | c, d                  | 131            | 117.30±12.89    | 0.82            |
|                         | Ear Height (EH)              | Inbred                    | I                  | a, b, c               | 27             | 62.31±12.94     | 0.84            |
|                         |                              | Inbred-derived haploid    | IV                 | d                     | 23             | 38.58±12.25     | -               |
|                         |                              | F1 Hybrid                 | II                 | b, c, d               | 154            | 92.43±12.14     | 0.82            |
|                         |                              | F1-derived haploid family | IV                 | c, d                  | 131            | 33.74±5.68      | 0.75            |
|                         | Days to Silking (DTS)        | Inbred                    | I                  | a, b, c               | 27             | 65.58±2.24      | 0.69            |
|                         |                              | Inbred-derived haploid    | IV                 | d                     | 23             | 63.21±0.63      | -               |
|                         |                              | F1 Hybrid                 | II                 | b, c, d               | 155            | 61.47±1.92      | 0.83            |
|                         |                              | F1-derived haploid family | IV                 | c, d                  | 132            | 63.36±0.42      | 0.16            |
| Yield-related traits    | Total Kernel Count (TKC)     | Inbred                    | I                  | c                     | 24             | 365.56±80.26    | -               |
|                         |                              | Inbred-derived haploid    | IV                 | d                     | 22             | 314.98±73.18    | -               |
|                         |                              | F1 Hybrid                 | II                 | b, c                  | 122            | 590.14±39.15    | 0.41            |
|                         |                              | F1-derived haploid family | IV                 | c, d                  | 132            | 270.46±22.01    | 0.38            |
|                         | Kernel Number Per Row (KNPR) | Inbred                    | I                  | c                     | 24             | 26.25±3.86      | -               |
|                         |                              | Inbred-derived haploid    | IV                 | d                     | 22             | 25.75±5.08      | -               |
|                         |                              | F1 Hybrid                 | II                 | b, c                  | 122            | 35.77±1.77      | 0.41            |
|                         |                              | F1-derived haploid family | IV                 | c, d                  | 132            | 23.43±1.23      | 0.41            |
| Kernel Row Number (KRN) | Inbred                       | I                         | c                  | 24                    | 13.90±2.13     | -               |                 |
|                         | Inbred-derived haploid       | IV                        | d                  | 22                    | 12.22±1.38     | -               |                 |
|                         | F1 Hybrid                    | II                        | b, c               | 121                   | 16.28±0.86     | 0.59            |                 |
|                         | F1-derived haploid family    | IV                        | c, d               | 131                   | 11.54±0.65     | 0.70            |                 |

<sup>†</sup>The data collection stage as described in **Figure 1**.

<sup>‡</sup>The location and year for data collection. Letter a denotes Winter 2017 at Sanya; b denotes Summer 2018 at Beijing; c denotes Winter 2018 at Sanya; and d denotes Summer 2019 at Beijing.

<sup>§</sup>Number of accessions.

\*Broad sense heritability. The "-" sign denotes a missing value.

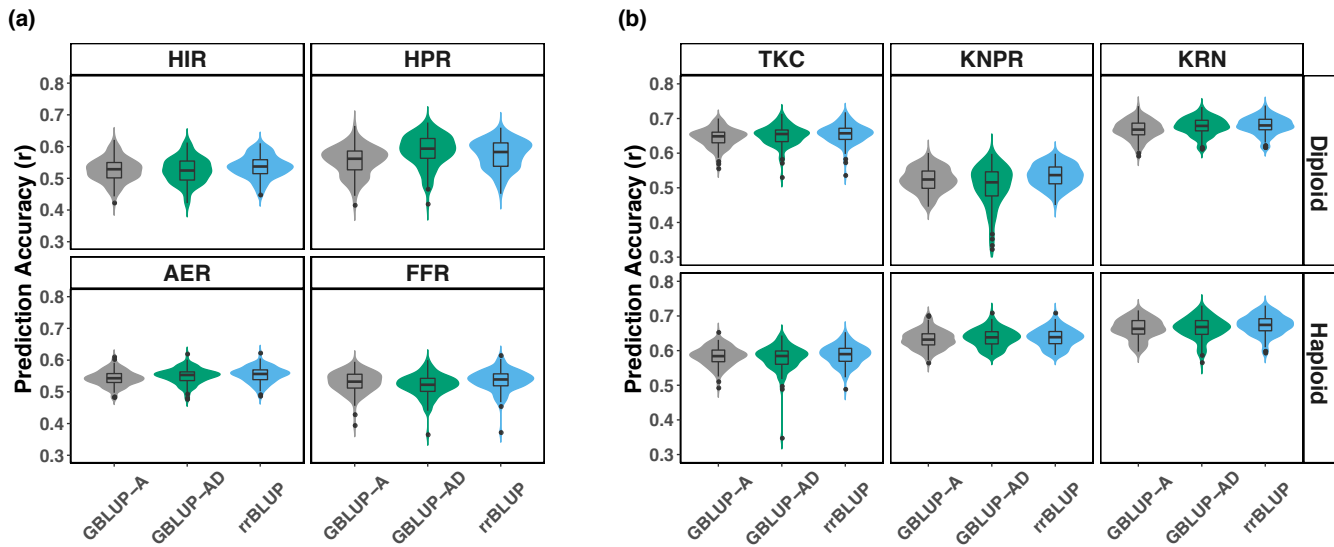

**Figure 3 Predictive ability on DH-production traits and yield-related traits.** (a) the prediction accuracy on the haploid induction rate (HIR), the haploid plant rate (HPR), the male fertility ratio (AER) and female fertility ratio (FFR) of the F1-derived haploid families. 3 models were used, genomic best linear unbiased prediction with additive effect (GBLUP-A), genomic best linear unbiased prediction with both additive and dominant effect (GBLUP-AD), ridge regression best linear unbiased prediction (rrBLUP); (b) the prediction accuracy on total kernel number (TKC), kernel number per row (KNPR), kernel row number (KRN) in diploid and haploid.

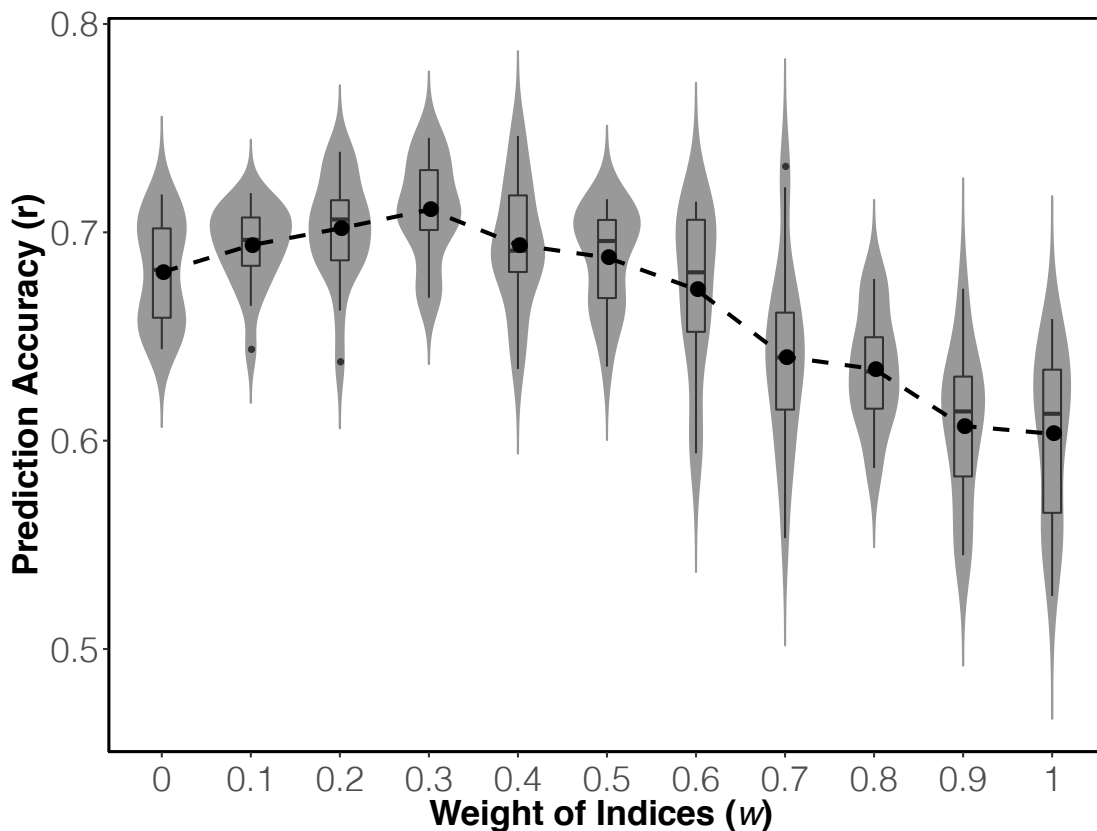

**Figure 4 Predictive ability on indices.** Horizontal axis denotes weight assigned to traits within the index.

263 hybrid population (**Figure S6**), which was largely due to the crossing design (**Figure S1**). Principal component  
 264 analysis (PCA) results also suggested three subgroups, with the first three principal components, explaining  
 265 20.76%, 20.12%, and 7.60% of the variances (**Figure S7**).

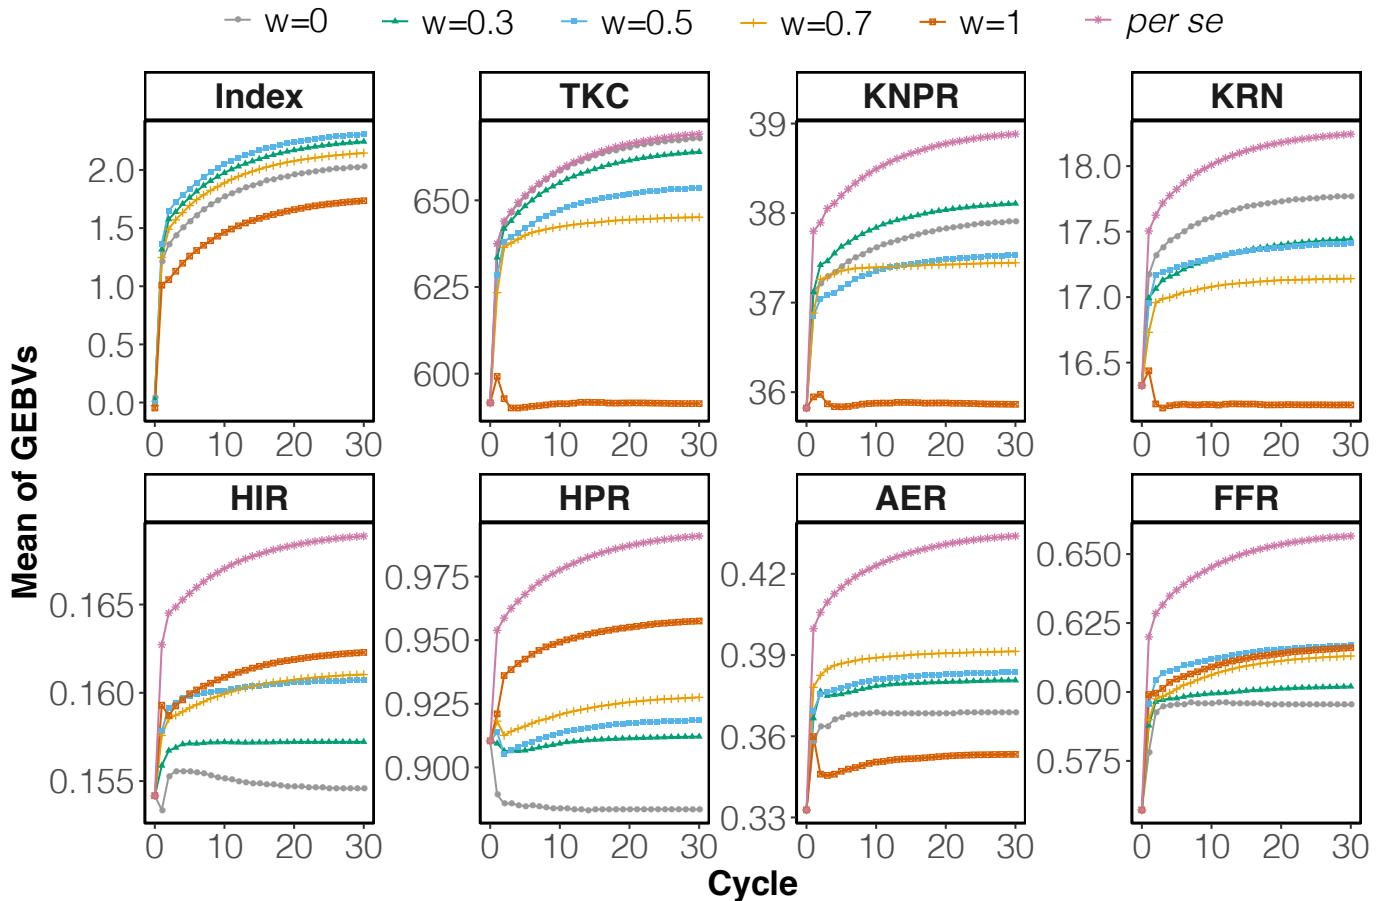

**Figure 5** Genomic estimate breeding values (GEBVs) generated by selecting on different indices over 30 cycles. Five indices were tested, using weights set at 0, 0.3, 0.5, 0.7, and 1.0 (the trait was referred to by the weight chosen). By selecting index, GEBVs changes for diploid yield-related traits (i.e., TKC, KNPR, KRN) and DH production related traits (i.e., HIR, HPR, AER, FFR) were also calculated. "Per se" means select by the trait itself.

266 Next, we employed the projected SNP data to predict the phenotypic performance for the F1 hybrid and  
 267 hybrid-derived haploid populations by taking account population structure and genetic relatedness into  
 268 consideration. For the prediction, three models were used, including additive genomic BLUP (GBLUP-A)  
 269 (VanRaden 2008), additive and dominance genomic BLUP (GBLUP-AD) (Da *et al.* 2014), and ridge regression  
 270 BLUP (rrBLUP) (Whittaker *et al.* 2000) models (see **Materials and methods**).

271 Using a 5-fold cross-validation approach, the average prediction accuracies were  $0.53 \pm 0.04$ ,  $0.57 \pm 0.05$ ,  
 272  $0.55 \pm 0.03$ , and  $0.52 \pm 0.04$  for HIR, HPR, AER, and FFR, respectively (**Figure 3 (a)**). The prediction accuracy  
 273 was significantly better than permutation results (Paired t-test, P-value < 0.01), suggesting that DH-production  
 274 traits can be predicted accurately.

275 For the yield-related traits, GBLUP-AD outperformed the GBLUP-A model in both haploid and diploid  
 276 populations, with the most considerable difference of 5.26% for the hybrid PH trait. These results were  
 277 consistent with the assumption that dominance alleles affect these traits (Yang *et al.* 2017, 2018) (**Figure 3 (b)**).  
 278 Similar patterns were also observed for predicting the developmental traits (**Figure S8**). The rrBLUP model, in  
 279 most cases, performed equally well with the GBLUP-AD model. We therefore selected the rrBLUP model for

280 the following analyses.

### 281 **The index traits integrated the DH production efficiency and agronomic performance**

282 Genomic selection models can accurately predict the traits individually. However, given the DH-production  
283 traits were largely negatively correlated with the yield-related traits (**Figure S5**), promising recombinants  
284 with high yield performance may not be able to be produced through the DH pipeline. To increase the DH  
285 production efficiency without sacrificing the yield performance, the index traits were constructed by weighting  
286 both DH-production traits and yield-related traits (see **Materials and methods**). After changing the weighting  
287 coefficient ( $w$ ) from 0 to 1 with step size of 0.1, rrBLUP results showed that prediction accuracy for the index  
288 trait peaked at  $w = 0.3$ , with the mean prediction accuracy = 0.71 (**Figure 4**).

289 In order to test the validity of index selection, we simulated the breeding selection process in 30 cycles  
290 (see **materials and methods**). In brief, a long-term selection experiment was simulated using our hybrid  
291 population as the initial training population (cycle 0). In the simulation, a fixed number of 1,000 seeds for  
292 each hybrid were induced per cycle. After considering the failure rate of each step during the DH-production  
293 process, the survived doubled-haploids were calculated for the genetic estimated breeding values (GEBVs)  
294 using the rrBLUP method. The top 20 DH lines were crossed based on a half diallel ( $N = 190$ ) to advance to  
295 the next breeding cycle.

296 The results showed that after 30 cycles of simulation most of the traits reached to the plateau (**Figure 5**).  
297 Using the indices as the selection traits, regardless of the  $w$  value, GEBVs continued to increase, especially  
298 during the first several cycles of selection. When  $w$  is 0.5, where the DH-production traits and yield-related  
299 traits were equally weighted, GEBVs of the index traits were promoted to the highest value in each selection  
300 cycle, eventually reaching to 2.31 after 30 cycles of selection. If only one set of traits were selected, the long-  
301 term responses were comparatively low, i.e., at cycle 30, GEBVs = 2.03 when  $w = 0$  (selecting only on the  
302 yield-related traits) and GEBV = 1.74 when  $w = 1$  (selecting only on the DH-production traits).

303 With the fixed number of induced plants ( $N = 1,000$  per hybrid), simulation results showed that the  
304 number of survived DH lines varied by the choices of  $w$ . The number was the highest at cycle 30 when  $w$   
305 =0.7, increasing from 26 to 36 (a 38% improvement) (**Figure S9**). Alternatively, using the fixed number of DH  
306 lines produced per hybrid ( $N = 100$ ), the index trait can be increased to 2.43 ( $w =0.5$ ) after 30 generations of  
307 selection compared to 2.31 ( $w =0.5$ ) using the fixed number of induced seeds, indicating that the production of  
308 more DH lines can improve the selection efficiency (**Figure S10**). However, the number of induced plants were  
309 almost tripled for each cycle, with  $w = 0.7$  showing the most efficient DH production (**Figure S11**).

310 Not surprisingly, the traits achieved their highest values if selected on the traits *per se* rather than the indices.  
311 For TKC, one of the most important yield component traits, selection on trait *per se*, made almost no differences  
312 compared to selection on the  $w = 0$  index trait. And the differences were minimum between selection on the  
313 trait *per se* and the  $w = 0.3$  index trait, suggesting it is feasible to improve the yield component trait and the  
314 DH production efficiency simultaneously.

315 The long-term responses of individual traits vary by the choices of  $w$  values. For TKC and KRN,  $w = 0$  made  
316 the greatest genetic gains, while for KNPR,  $w = 0.3$  increased the most over 30 cycles of selection. Interestingly,  
317  $w = 0.7$  won the first 13 cycles of selection for KNPR; however, after cycle 13,  $w = 0.5$  started to perform better.  
318 For DH-production traits, when  $w =1$ , HIR and HPR achieved the best results, increasing from 0.154 to 0.162  
319 and 0.91 to 0.96 over 30 generations, respectively. The most effective  $w$  values for AER and FFR were 0.7 and  
320 0.5, respectively. When  $w =1$ , due to negative correlations, the selection of the DH-production traits led to the  
321 negative responses for the TKC and KRN traits. Similarly, the negative response was observed for the HPR  
322 trait when selecting on the yield-related traits only (or  $w = 0$ ). When the index coefficient of  $w$  was 0.3, 0.5,  
323 and 0.7, all traits were positively selected, suggesting that long-term selection using the index trait effectively  
324 increased both yield and DH production efficiency.

## 325 Discussion

### 326 **Genomic selection technology could increase the long-term genetic gain**

327 In the present study, DH lines were produced through a classical DH production pipeline for hybrid maize  
328 breeding (Prasanna *et al.* 2012). During the process, the DH-production traits, developmental traits, and  
329 yield-related traits were collected from haploids and diploids across multiple environments, which allowed us  
330 to calculate heritabilities for these traits. Results showed that four DH-production traits showed moderate  
331 levels of heritability ( $H^2$  ranged from 0.39 - 0.44), suggesting that DH production efficiency is under genetic  
332 control (Ma *et al.* 2018; Wu *et al.* 2014). For DH-production and yield-related traits, heritability estimations  
333 were highly consistent between haploids and diploids, suggesting limited contributions of allele interactions to  
334 the genetic variance.

335 The observation that some valuable hybrids were less efficient in generating DH lines provided an obstacle  
336 for further crop improvement through the recurrent selection approach (Bradshaw 2017). GS technology, a  
337 method to predict the phenotypic performance (i.e., the DH-production traits) without phenotyping, was  
338 proposed here to overcome the bottleneck. Promisingly, a moderate level of the prediction accuracy for each of  
339 the DH production traits was achieved (**Figure 3 (a)**), suggesting it is feasible to predict the DH-production  
340 traits before the haploid induction. Therefore, in practice, these predicted GEBVs can be leveraged to optimize  
341 the haploid induction, identification, doubling, and selfing processes. For example, more plants can be  
342 induced for hybrids with low inducing rates; the oil content approach can be used to improve haploid kernel  
343 identification instead of using the cost effective but less accurate coloring system (Ming 2003; Li *et al.* 2009a);  
344 and hybrids with low predicted chromosome doubling rates can be assisted with the chemical agent for  
345 chromosome doubling (Jumpatong *et al.* 1996). Even without using these additional enhancement approaches,  
346 simulation results showed that the long-term selection responses were significantly larger by allocating the  
347 appropriate number of inductions for each genotype than by inducing the same number of haploids for all  
348 genetic backgrounds. The improvement for the total kernel count after 30 cycles of simulated selection was up  
349 to by 13%, a substantial improvement achieved just by allocating resources differently.

### 350 **Index selection improved multiple traits simultaneously**

351 The ultimate goal of DH-based plant breeding is to increase agronomic traits performance. In practice, however,  
352 low DH-production efficiency creates the logistics burden. To improve both types of traits, index traits  
353 considering these two were constructed. The cross-validation results suggested that the weighting coefficient  
354 ( $w = 0.3$ ) provided the best prediction accuracy for the index trait, - 4.41% and 18.33% improvements compared  
355 to selecting only on yield-related traits ( $w = 0$ ) and DH-production traits ( $w = 1$ ), respectively. However,  
356 the long-term responses for the index traits performed the best when weighing both types of traits equally  
357 ( $w = 0.5$ ). According to Falconer and Mackay (Falconer and Mackay 1996), the long-term response to selection  
358 is influenced by the intensity of selection, the heritability of the trait, and the standard deviation of the breeding  
359 value. Therefore, it is reasonable that higher prediction accuracy alone can't guarantee the best long-term  
360 response.

361 For the individual trait of interest, index selections (i.e.,  $w = 0.3, 0.5$ , or  $0.7$  in our simulations) led to multiple  
362 traits improvement simultaneously, although the magnitudes of responses were smaller than directly selected  
363 on the trait *per se* (Su *et al.* 2012; Cui *et al.* 2020). Index selection, however, will avoid the situations of traits  
364 declining if they were negatively correlated with the trait that was under direct selection.

### 365 **Genomic selection models performed equally well in predicting DH-production traits**

366 The predictive ability of a given model can be affected by heritability, training population size, the density  
367 of the markers, and the mating design alongside with the genetic architecture of the trait (Jumpatong *et al.*  
368 1996). Previous studies and our own data showed that DH-production traits were complex traits controlled by  
369 many small-effect QTLs with relatively low heritability (Boerman *et al.* 2020; Ren *et al.* 2020). After comparing  
370 multiple GS models, our results suggested rrBLUP and GBLUP (including GBLUP-A and GBLUP-AD) only  
371 exhibited subtle differences in predicting the DH-production traits. Overall, the rrBLUP was considered  
372 a stable model, because in most cases, it performed the best or close to the best performing models. For



373 the developmental and yield-related traits, dominance GBLUP (GBLUP-AD) exhibited higher prediction  
374 accuracies than the additive GBLUP (GBLUP-A) model in the diploid populations.

375 Overall, this study provided evidence that it is feasible to use GS technology to optimize the DH-based  
376 plant breeding. If implemented appropriately, the long-term genetic gain can be substantial, as illustrated by  
377 the simulations. This overall strategy can be applied, not only for maize but for other crop species, to breed the  
378 next generation of crop species faster and more cost-effectively.

## 379 **ACKNOWLEDGEMENTS**

380 This research was funded by the National Key Research and Development Plan (2016YFD0101200), the Modern  
381 Maize Industry Technology System (CARS-02-04), and the Beijing Agricultural Reform and Development  
382 Special Transfer Payment Fund from Beijing Municipal Bureau of Agriculture and Rural Affairs to S.C.. This  
383 project was also partly supported by an Agriculture and Food Research Initiative Grant (Number 2019-67013-  
384 29167) from the USDA National Institute of Food and Agriculture, and by the University of Nebraska-Lincoln  
385 start-up fund to J.Y.. The computational work was completed utilizing the Holland Computing Center of  
386 the University of Nebraska, which receives support from the Nebraska Research Initiative. We thank Beijing  
387 Tongzhou International Seed Science and Technology Co., Ltd. for the genotyping effort.

## 388 **AUTHOR CONTRIBUTIONS**

389 S.C., J.Y. and J.L. designed this work. J.L., D.C., S.G., M.C., C.C., Y.J., W.L, Y.Z. and X.Q. generated the data.  
390 J.L., J.Y., and Z.Y. analyzed the data. S.C. and C.L. provided conceptual advice. J.Y., J.L., and S.C. wrote the  
391 manuscript.

## 392 **DATA AVAILABILITY**

393 The data and code of this project were released at the GitHub repository ([https://github.com/lijinlong1991/  
394 DH-production-GS](https://github.com/lijinlong1991/DH-production-GS)).

## 395 **COMPETING INTERESTS STATEMENT**

396 The authors declare no competing financial interests.

## 397 Literature Cited

- 398 Alves, F. C., Í. S. C. Granato, G. Galli, D. H. Lyra, R. Fritsche-Neto, *et al.*, 2019 Bayesian analysis and prediction  
399 of hybrid performance. *Plant methods* **15**: 14.
- 400 Bates, D., M. Maechler, B. Bolker, S. Walker, R. H. B. Christensen, *et al.*, 2015 Package 'lme4'. *Convergence* **12**: 2.
- 401 Boerman, N. A., U. K. Frei, and T. Lübberstedt, 2020 Impact of spontaneous haploid genome doubling in maize  
402 breeding. *Plants* **9**: 369.
- 403 Bradshaw, J. E., 2017 Plant breeding: past, present and future. *Euphytica* **213**: 60.
- 404 Chaikam, V., M. Gowda, S. K. Nair, A. E. Melchinger, and P. M. Boddupalli, 2019a Genome-wide association  
405 study to identify genomic regions influencing spontaneous fertility in maize haploids. *Euphytica* **215**: 138.
- 406 Chaikam, V., W. Molenaar, A. E. Melchinger, and P. M. Boddupalli, 2019b Doubled haploid technology for line  
407 development in maize: technical advances and prospects. *Theoretical and Applied Genetics* pp. 1–17.
- 408 Chaikam, V., S. K. Nair, R. Babu, L. Martinez, J. Tejomurtula, *et al.*, 2015 Analysis of effectiveness of r1-nj  
409 anthocyanin marker for in vivo haploid identification in maize and molecular markers for predicting the  
410 inhibition of r1-nj expression. *Theoretical and applied genetics* **128**: 159–171.
- 411 Chalyk, S., 1999 Creating new haploid-inducing lines of maize. *Maize Genetics Cooperation Newsletter* **73**:  
412 53–53.
- 413 Chang, C. C., C. C. Chow, L. C. Tellier, S. Vattikuti, S. M. Purcell, *et al.*, 2015 Second-generation plink: rising to  
414 the challenge of larger and richer datasets. *Gigascience* **4**: s13742–015.
- 415 Ciampitti, I. A., R. W. Elmore, and J. Lauer, 2011 Corn growth and development. *Dent* **5**: 75.
- 416 Crossa, J., P. Perez, J. Hickey, J. Burgueno, L. Ornella, *et al.*, 2014 Genomic prediction in cimmyt maize and  
417 wheat breeding programs. *Heredity* **112**: 48–60.
- 418 Cui, Y., R. Li, G. Li, F. Zhang, T. Zhu, *et al.*, 2020 Hybrid breeding of rice via genomic selection. *Plant*  
419 *biotechnology journal* **18**: 57–67.
- 420 Da, Y., C. Wang, S. Wang, and G. Hu, 2014 Mixed model methods for genomic prediction and variance  
421 component estimation of additive and dominance effects using snp markers. *PloS one* **9**: e87666.
- 422 Dong, L., L. Li, C. Liu, C. Liu, S. Geng, *et al.*, 2018 Genome editing and double-fluorescence proteins enable  
423 robust maternal haploid induction and identification in maize. *Molecular plant* **11**: 1214–1217.
- 424 e Sousa, M. B., J. Cuevas, E. G. de Oliveira Couto, P. Pérez-Rodríguez, D. Jarquín, *et al.*, 2017 Genomic-enabled  
425 prediction in maize using kernel models with genotype × environment interaction. *G3: Genes, Genomes,*  
426 *Genetics* **7**: 1995–2014.
- 427 Endelman, J. B., 2011 Ridge regression and other kernels for genomic selection with r package rrblup. *The*  
428 *Plant Genome* **4**: 250–255.
- 429 Falconer, D. and T. Mackay, 1996 *Introduction to quantitative genetics*. 1996. Harlow, Essex, UK: Longmans  
430 *Green* **3**.
- 431 Geiger, H., M. Braun, G. Gordillo, S. Koch, J. Jesse, *et al.*, 2006 Variation for female fertility among haploid  
432 maize lines. *Maize Genetics Cooperation Newsletter* **80**: 28.
- 433 Gianola, D., 2013 Priors in whole-genome regression: the bayesian alphabet returns. *Genetics* **194**: 573–596.
- 434 Gianola, D., R. L. Fernando, and A. Stella, 2006 Genomic-assisted prediction of genetic value with semipara-  
435 metric procedures. *Genetics* **173**: 1761–1776.
- 436 Gianola, D., H. Okut, K. A. Weigel, and G. J. Rosa, 2011 Predicting complex quantitative traits with bayesian  
437 neural networks: a case study with jersey cows and wheat. *BMC genetics* **12**: 87.
- 438 Gilles, L. M., A. Khaled, J.-B. Laffaire, S. Chaignon, G. Gendrot, *et al.*, 2017 Loss of pollen-specific phospholipase  
439 not like dad triggers gynogenesis in maize. *The EMBO journal* **36**: 707–717.
- 440 Habier, D., R. L. Fernando, K. Kizilkaya, and D. J. Garrick, 2011 Extension of the bayesian alphabet for genomic  
441 selection. *BMC bioinformatics* **12**: 186.
- 442 Hayes, B., M. Goddard, *et al.*, 2001 Prediction of total genetic value using genome-wide dense marker maps.  
443 *Genetics* **157**: 1819–1829.
- 444 Henderson, C. R. *et al.*, 1984 *Applications of linear models in animal breeding*, volume 462. University of Guelph  
445 Guelph.
- 446 Hu, X., W. Xie, C. Wu, and S. Xu, 2019 A directed learning strategy integrating multiple omic data improves

- 447 genomic prediction. *Plant biotechnology journal* **17**: 2011–2020.
- 448 Jacquier, N. M., L. M. Gilles, D. E. Pyott, J.-P. Martinant, P. M. Rogowsky, *et al.*, 2020 Puzzling out plant  
449 reproduction by haploid induction for innovations in plant breeding. *Nature Plants* pp. 1–10.
- 450 Jones, R. W., T. Reinot, U. K. Frei, Y. Tseng, T. Lübberstedt, *et al.*, 2012 Selection of haploid maize kernels from  
451 hybrid kernels for plant breeding using near-infrared spectroscopy and simca analysis. *Applied spectroscopy*  
452 **66**: 447–450.
- 453 Jumpatong, C., P. Boonyai, N. Sangduen, R. Thiraporn, S. Saisingtong, *et al.*, 1996 Anther culture—a new tool  
454 for the generation of doubled haploid, homozygous maize in thailand. *Thai Journal of Agricultural Science*  
455 (Thailand) .
- 456 Kärkkäinen, H. P. and M. J. Sillanpää, 2012 Back to basics for bayesian model building in genomic selection.  
457 *Genetics* **191**: 969–987.
- 458 Kebede, A. Z., B. S. Dhillon, W. Schipprack, J. L. Araus, M. Bänziger, *et al.*, 2011 Effect of source germplasm and  
459 season on the in vivo haploid induction rate in tropical maize. *Euphytica* **180**: 219–226.
- 460 Kelliher, T., D. Starr, L. Richbourg, S. Chintamanani, B. Delzer, *et al.*, 2017 Matrilinial, a sperm-specific  
461 phospholipase, triggers maize haploid induction. *Nature* **542**: 105–109.
- 462 Li, L., X. Xu, W. Jin, and S. Chen, 2009a Morphological and molecular evidences for dna introgression in  
463 haploid induction via a high oil inducer cauhoi in maize. *Planta* **230**: 367–376.
- 464 Li, Y., C. Sun, Z. Huang, J. Pan, L. Wang, *et al.*, 2009b Mechanisms of progressive water deficit tolerance and  
465 growth recovery of chinese maize foundation genotypes huangzao 4 and chang 7-2, which are proposed  
466 on the basis of comparison of physiological and transcriptomic responses. *Plant and Cell Physiology* **50**:  
467 2092–2111.
- 468 Lin, J., J. Li, W. Li, H. Qin, and S. Chen, 2019 A data transfer method for improving seed identification of maize  
469 (*zea mays*) haploid breeding based on genetic similarity. *Plant Breeding* **138**: 790–801.
- 470 Lin, Z., N. O. Cogan, L. W. Pembleton, G. C. Spangenberg, J. W. Forster, *et al.*, 2016 Genetic gain and inbreeding  
471 from genomic selection in a simulated commercial breeding program for perennial ryegrass. *The Plant*  
472 *Genome* **9**.
- 473 Liu, C., X. Li, D. Meng, Y. Zhong, C. Chen, *et al.*, 2017 A 4-bp insertion at *zmpla1* encoding a putative  
474 phospholipase a generates haploid induction in maize. *Molecular plant* **10**: 520–522.
- 475 Ma, H., G. Li, T. Würschum, Y. Zhang, D. Zheng, *et al.*, 2018 Genome-wide association study of haploid male  
476 fertility in maize (*zea mays* l.). *Frontiers in plant science* **9**: 974.
- 477 Ming, C. S. J. S. T., 2003 Identification haploid with high oil xenia effect in maize [j]. *Acta Agronomica Sinica* **4**.
- 478 Molenaar, W. S., W. Schipprack, P. C. Brauner, and A. E. Melchinger, 2019 Haploid male fertility and sponta-  
479 neous chromosome doubling evaluated in a diallel and recurrent selection experiment in maize. *Theoretical*  
480 *and Applied Genetics* **132**: 2273–2284.
- 481 Ogutu, J. O., T. Schulz-Streeck, and H.-P. Piepho, 2012 Genomic selection using regularized linear regression  
482 models: ridge regression, lasso, elastic net and their extensions. In *BMC proceedings*, volume 6, p. S10,  
483 Springer.
- 484 Porebski, S., L. G. Bailey, and B. R. Baum, 1997 Modification of a ctab dna extraction protocol for plants  
485 containing high polysaccharide and polyphenol components. *Plant molecular biology reporter* **15**: 8–15.
- 486 Prasanna, B., V. Chaikam, and G. Mahuku, 2012 *Doubled haploid technology in maize breeding: theory and practice*.  
487 CIMMYT.
- 488 Prigge, V. and A. E. Melchinger, 2012 Production of haploids and doubled haploids in maize. In *Plant cell*  
489 *culture protocols*, pp. 161–172, Springer.
- 490 Prigge, V., X. Xu, L. Li, R. Babu, S. Chen, *et al.*, 2012 New insights into the genetics of in vivo induction of  
491 maternal haploids, the backbone of doubled haploid technology in maize. *Genetics* **190**: 781–793.
- 492 Pritchard, J. K., M. Stephens, and P. Donnelly, 2000 Inference of population structure using multilocus genotype  
493 data. *Genetics* **155**: 945–959.
- 494 Ren, J., N. A. Boerman, R. Liu, P. Wu, B. Trampe, *et al.*, 2020 Mapping of qtl and identification of candidate  
495 genes conferring spontaneous haploid genome doubling in maize (*zea mays* l.). *Plant Science* **293**: 110337.
- 496 Ren, J., P. Wu, B. Trampe, X. Tian, T. Lübberstedt, *et al.*, 2017 Novel technologies in doubled haploid line

- 497 development. *Plant biotechnology journal* **15**: 1361–1370.
- 498 Röber, F., G. Gordillo, and H. Geiger, 2005 In vivo haploid induction in maize-performance of new inducers  
499 and significance of doubled haploid lines in hybrid breeding. *Maydica* **50**: 275–283.
- 500 Rotarencu, V., G. Dicu, S. Fuaia, *et al.*, 2010 New inducers of maternal haploids in maize. *Maize genetics*  
501 *cooperation newsletter* pp. 21–22.
- 502 Saisingtong, S., J. Schmid, P. Stamp, and B. Büter, 1996 Colchicine-mediated chromosome doubling during  
503 anther culture of maize (*zea mays* l.). *Theoretical and applied genetics* **92**: 1017–1023.
- 504 Slater, A. T., N. O. Cogan, J. W. Forster, B. J. Hayes, and H. D. Daetwyler, 2016 Improving genetic gain with  
505 genomic selection in autotetraploid potato. *The plant genome* **9**.
- 506 Su, G., P. Madsen, U. S. Nielsen, E. A. Mäntysaari, G. P. Aamand, *et al.*, 2012 Genomic prediction for nordic red  
507 cattle using one-step and selection index blending. *Journal of Dairy Science* **95**: 909–917.
- 508 Technow, F., 2011 R package hypred: Simulation of genomic data in applied genetics. University of Hohenheim  
509 .
- 510 Technow, F., C. Riedelsheimer, T. A. Schrag, and A. E. Melchinger, 2012 Genomic prediction of hybrid perfor-  
511 mance in maize with models incorporating dominance and population specific marker effects. *Theoretical*  
512 *and Applied Genetics* **125**: 1181–1194.
- 513 Tian, X., Y. Qin, B. Chen, C. Liu, L. Wang, *et al.*, 2018 Hetero-fertilization together with failed egg-sperm cell  
514 fusion supports single fertilization involved in in vivo haploid induction in maize. *Journal of experimental*  
515 *botany* **69**: 4689–4701.
- 516 VanRaden, P. M., 2008 Efficient methods to compute genomic predictions. *Journal of dairy science* **91**: 4414–  
517 4423.
- 518 Whittaker, J. C., R. Thompson, and M. C. Denham, 2000 Marker-assisted selection using ridge regression.  
519 *Genetics Research* **75**: 249–252.
- 520 Wu, P., H. Li, J. Ren, and S. Chen, 2014 Mapping of maternal qtls for in vivo haploid induction rate in maize  
521 (*zea mays* l.). *Euphytica* **196**: 413–421.
- 522 Wu, P., J. Ren, X. Tian, T. Lübberstedt, W. Li, *et al.*, 2017 New insights into the genetics of haploid male fertility  
523 in maize. *Crop Science* **57**: 637–647.
- 524 Yang, J., S. Mezmouk, A. Baumgarten, E. S. Buckler, K. E. Guill, *et al.*, 2017 Incomplete dominance of deleterious  
525 alleles contributes substantially to trait variation and heterosis in maize. *PLoS genetics* **13**: e1007019.
- 526 Yang, J., R. K. Ramamurthy, X. Qi, R. L. Fernando, J. C. Dekkers, *et al.*, 2018 Empirical comparisons of  
527 different statistical models to identify and validate kernel row number-associated variants from structured  
528 multi-parent mapping populations of maize. *G3: Genes, Genomes, Genetics* **8**: 3567–3575.
- 529 Yu, J., J. B. Holland, M. D. McMullen, and E. S. Buckler, 2008 Genetic design and statistical power of nested  
530 association mapping in maize. *Genetics* **178**: 539–551.
- 531 Zhong, Y., C. Liu, X. Qi, Y. Jiao, D. Wang, *et al.*, 2019 Mutation of *zmdmp* enhances haploid induction in maize.  
532 *Nature plants* **5**: 575–580.
